# Supplementary material for: Opposite Roles of Wnt7a and Sfrp1 in Modulating Proper Development of Neural Progenitors in the Mouse Cerebral Cortex
Source: Front Mol Neurosci. 2018 Jul 17;11:247. doi: 10.3389/fnmol.2018.00247 (PMC6056652; doi:10.3389/fnmol.2018.00247)
Supplement: Supplementary file 2 [file Table_2.xls]

## Sheet: MappingStatistic_E12.5-1
#Mapping_Statistics
Statistics	Result
All	28547544
UnMapped	2228376
Mapped	26319168
MappedRate	0.922
UniqueMapped	24901886
UniqueMappedRate	0.872
RepeatMapped	1417295
JunctionAllMapped	7376787
JunctionUniqueMapped	7373762
########################
Chr_Distribution
ChrID	MappedReadsNum	MappedReadsProp	ChrLen	ChrLenProp
chr1	1495517	0.0568224	195471971	0.0717187
chr2	2053476	0.0780221	182113224	0.0668174
chr3	1051556	0.039954	160039680	0.0587186
chr4	1540417	0.0585283	156508116	0.0574228
chr5	1653250	0.0628154	151834684	0.0557082
chr6	1376926	0.0523165	149736546	0.0549384
chr7	1957994	0.0743942	145441459	0.0533625
chr8	1444788	0.0548949	129401213	0.0474773
chr9	1534094	0.0582881	124595110	0.045714
chr10	1235126	0.0469288	130694993	0.047952
chr11	2207070	0.0838579	122082543	0.0447921
chr12	802046	0.0304738	120129022	0.0440753
chr13	737714	0.0280295	120421639	0.0441827
chr14	861250	0.0327233	124902244	0.0458266
chr15	1233759	0.0468768	104043685	0.0381736
chr16	721984	0.0274319	98207768	0.0360324
chr17	1733073	0.0658483	94987271	0.0348508
chr18	752992	0.02861	90702639	0.0332788
chr19	904834	0.0343793	61431566	0.0225392
chrx	671250	0.0255042	171031299	0.0627514
chry	4505	0.000171168	91744698	0.0336611
chrm	345547	0.0131291	16299	5.9801e-06

## Sheet: MappingStatistic_E12.5-2
#Mapping_Statistics
Statistics	Result
All	27289172
UnMapped	1802540
Mapped	25486632
MappedRate	0.934
UniqueMapped	23821214
UniqueMappedRate	0.873
RepeatMapped	1665429
JunctionAllMapped	7812151
JunctionUniqueMapped	7809320
########################
Chr_Distribution
ChrID	MappedReadsNum	MappedReadsProp	ChrLen	ChrLenProp
chr1	1453951	0.0570476	195471971	0.0717187
chr2	1998796	0.0784253	182113224	0.0668174
chr3	974012	0.0382166	160039680	0.0587186
chr4	1512541	0.0593464	156508116	0.0574228
chr5	1667632	0.0654316	151834684	0.0557082
chr6	1198339	0.0470183	149736546	0.0549384
chr7	2004835	0.0786622	145441459	0.0533625
chr8	1420184	0.0557227	129401213	0.0474773
chr9	1523418	0.0597732	124595110	0.045714
chr10	1256596	0.0493041	130694993	0.047952
chr11	2228044	0.0874201	122082543	0.0447921
chr12	749813	0.0294199	120129022	0.0440753
chr13	719171	0.0282176	120421639	0.0441827
chr14	776591	0.0304705	124902244	0.0458266
chr15	1286275	0.0504686	104043685	0.0381736
chr16	635439	0.0249322	98207768	0.0360324
chr17	1437727	0.056411	94987271	0.0348508
chr18	626990	0.0246007	90702639	0.0332788
chr19	961137	0.0377114	61431566	0.0225392
chrx	712770	0.0279664	171031299	0.0627514
chry	3027	0.000118768	91744698	0.0336611
chrm	339344	0.0133146	16299	5.9801e-06

## Sheet: MappingStatistic_E12.5-3
#Mapping_Statistics
Statistics	Result
All	29753653
UnMapped	2190150
Mapped	27563503
MappedRate	0.926
UniqueMapped	25889945
UniqueMappedRate	0.87
RepeatMapped	1673569
JunctionAllMapped	8165331
JunctionUniqueMapped	8162257
########################
Chr_Distribution
ChrID	MappedReadsNum	MappedReadsProp	ChrLen	ChrLenProp
chr1	1607428	0.0583173	195471971	0.0717187
chr2	2156408	0.0782342	182113224	0.0668174
chr3	1140009	0.0413594	160039680	0.0587186
chr4	1650497	0.0598798	156508116	0.0574228
chr5	1787116	0.0648363	151834684	0.0557082
chr6	1405536	0.0509926	149736546	0.0549384
chr7	2057625	0.0746503	145441459	0.0533625
chr8	1497060	0.0543131	129401213	0.0474773
chr9	1638717	0.0594524	124595110	0.045714
chr10	1335603	0.0484555	130694993	0.047952
chr11	2337102	0.0847897	122082543	0.0447921
chr12	890284	0.0322994	120129022	0.0440753
chr13	841361	0.0305245	120421639	0.0441827
chr14	838955	0.0304372	124902244	0.0458266
chr15	1339426	0.0485942	104043685	0.0381736
chr16	717988	0.0260485	98207768	0.0360324
chr17	1518904	0.0551056	94987271	0.0348508
chr18	730774	0.0265124	90702639	0.0332788
chr19	991584	0.0359745	61431566	0.0225392
chrx	787814	0.0285818	171031299	0.0627514
chry	5471	0.000198487	91744698	0.0336611
chrm	287841	0.0104428	16299	5.9801e-06
